# Supplementary material for: Effectiveness and safety of afatinib, gefitinib, and erlotinib for treatment-naïve elderly patients with epidermal growth factor receptor-mutated advanced non-small-cell lung cancer: a multi-institute retrospective study
Source: Aging (Albany NY). 2024 Jan 8;16(1):550–67. doi: 10.18632/aging.205395 (PMC10817377; doi:10.18632/aging.205395)
Supplement: Supplementary Table 1 [file aging-16-205395-s002.pdf]

## SUPPLEMENTARY TABLE

**Supplementary Table 1. Patients' characteristics between younger patients (age < 65 years) and older patients (age ≥ 65 years).**

| Characteristics    | Age (years)   |              | p-Value |
|--------------------|---------------|--------------|---------|
|                    | <65 (N = 554) | ≥65 (N =789) |         |
| Sex                |               |              | 0.697   |
| Male               | 220 (39.7%)   | 305 (38.7%)  |         |
| Female             | 334 (60.3%)   | 484 (61.3%)  |         |
| Performance status |               |              | <0.0001 |
| 0                  | 128 (23.1%)   | 105 (13.3%)  |         |
| 1                  | 340 (61.4%)   | 483 (61.2%)  |         |
| 2                  | 58 (10.5%)    | 119 (15.1%)  |         |
| 3                  | 22 (4.0%)     | 50 (6.3%)    |         |
| 4                  | 6 (1.0%)      | 32 (4.1%)    |         |
| Smoking            |               |              | 0.015   |
| No                 | 400 (72.2%)   | 603 (76.5%)  |         |
| Yes                | 143 (25.8%)   | 158 (20.0%)  |         |
| Unknown            | 11 (2.0%)     | 28 (3.5%)    |         |
| Tumor morphology   |               |              | 0.273   |
| Adenocarcinoma     | 546 (98.6%)   | 771 (97.7%)  |         |
| Non-adenocarcinoma | 8 (1.4%)      | 18 (2.3%)    |         |
| Mutation           |               |              | <0.0001 |
| Exon 19 deletion   | 247 (44.6%)   | 445 (56.4%)  |         |
| L858R              | 307 (55.4%)   | 344 (43.6%)  |         |
| Stage              |               |              | 0.032   |
| IIIB               | 30 (5.4%)     | 67 (8.5%)    |         |
| IV                 | 524 (94.6%)   | 722 (91.5%)  |         |
| EGFR-TKI           |               |              | <0.0001 |
| Afinib             | 323 (58.3%)   | 312 (39.6%)  |         |
| Erlotinib          | 149 (26.9%)   | 259 (32.8%)  |         |
| Gefitinib          | 82 (14.8%)    | 218 (27.6%)  |         |
| Liver metastasis   |               |              | 0.069   |
| Yes                | 85 (15.3%)    | 94 (11.9%)   |         |
| No                 | 469 (84.7%)   | 695 (88.1%)  |         |
| Brain metastasis   |               |              | 0.001   |
| Yes                | 207 (37.4%)   | 228 (28.9%)  |         |
| No                 | 347 (62.6%)   | 561 (71.1%)  |         |
| Lung metastasis    |               |              | 0.425   |
| Yes                | 212 (38.3%)   | 319 (40.4%)  |         |
| No                 | 342 (61.7%)   | 470 (59.6%)  |         |
| Bone metastasis    |               |              | <0.0001 |
| Yes                | 298 (53.8%)   | 325 (41.2%)  |         |
| No                 | 256 (46.2%)   | 464 (58.8%)  |         |
| Pleura metastasis  |               |              | 0.002   |
| Yes                | 214 (38.6%)   | 372 (47.1%)  |         |
| No                 | 340 (61.4%)   | 417 (52.9%)  |         |
| Adrenal metastasis |               |              | 0.765   |
| Yes                | 50 (9.0%)     | 75 (9.5%)    |         |

|                               |             |             |       |
|-------------------------------|-------------|-------------|-------|
| No                            | 504 (91.0%) | 714 (90.5%) | 0.044 |
| Distant lymph node metastasis |             |             |       |
| Yes                           | 72 (13.0%)  | 75 (9.5%)   | 0.423 |
| No                            | 482 (87.0%) | 714 (90.5%) |       |
| Pericardia metastasis         |             |             | 0.654 |
| Yes                           | 10 (1.8%)   | 10 (1.3%)   |       |
| No                            | 544 (98.2%) | 779 (98.7%) | 0.654 |
| Peritoneal metastasis         |             |             |       |
| Yes                           | 1 (0.2%)    | 4 (0.5%)    | 0.654 |
| No                            | 553 (99.8%) | 785 (99.5%) |       |

Footnote: Continuous variables were compared using a t-test or analysis of variance. Categorical variables were compared using a Chi-square or Fisher's exact test.

Abbreviations: EGFR-TKI, epidermal growth factor receptor-tyrosine kinase inhibitor.
